# Supplementary material for: Skeletal muscle proteomes reveal downregulation of mitochondrial proteins in transition from prediabetes into type 2 diabetes
Source: PubMed Central journal article supplement — iScience. 2021 Jun 10;24(7):102712. doi: 10.1016/j.isci.2021.102712 (PMC8246593; doi:10.1016/j.isci.2021.102712), 2021-06-10
Supplement: mmc1.pdf [file mmc1.pdf]

**iScience, Volume 24**

**Supplemental information**

**Skeletal muscle proteomes reveal downregulation  
of mitochondrial proteins in transition  
from prediabetes into type 2 diabetes**

**Tiina Öhman, Jaakko Teppo, Neeta Datta, Selina Mäkinen, Markku Varjosalo, and Heikki  
A. Koistinen**

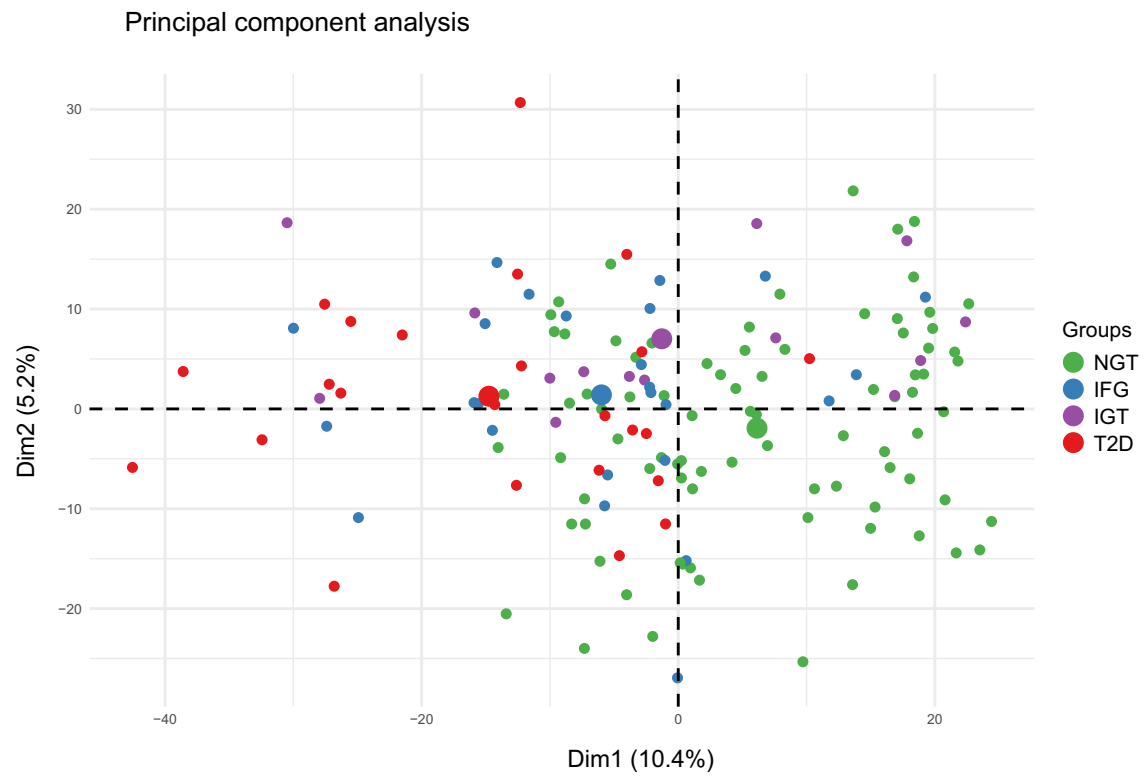

**Figure S1.** PCA analysis of 148 skeletal muscle SWATH-samples. Bigger spots indicate average of sample group. Related to Figure 2A.

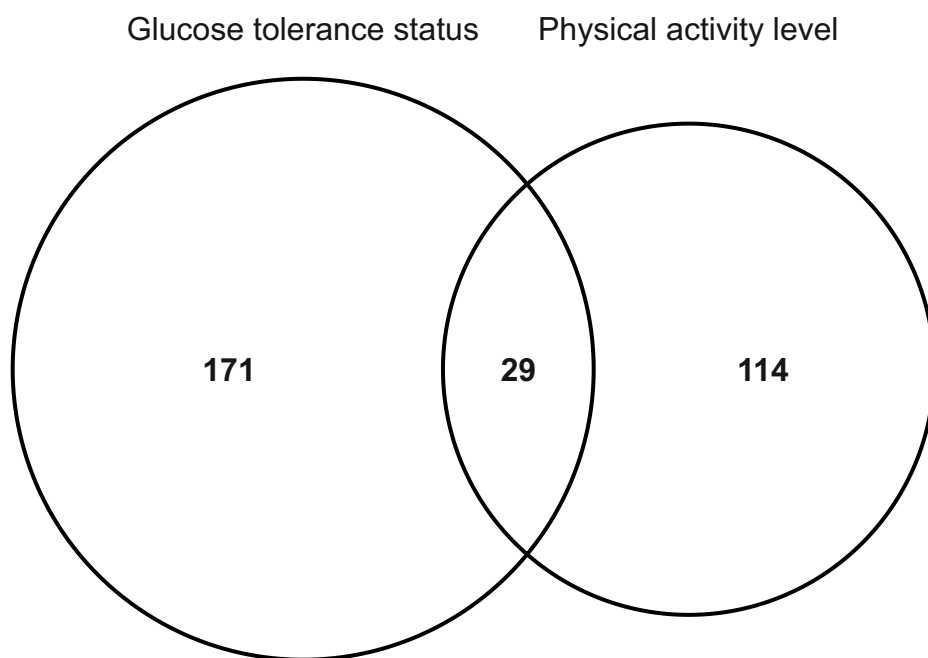

**Figure S2.** Overlap between the proteins with their abundance significantly ( $q < 0.05$ ) affected by the subjects' glucose tolerance status and physical activity level in the multiple linear regression model. Related to Table S6.
